# Supplementary material
Source: publisher figshare collection journal article supplement (https://acs.figshare.com/ndownloader/files/6036891)
Supplement: Supplementary file 1 [file 6036891]

# Changes of microemulsion structure during polymerization of aqueous and organic phases – Supporting Information –

Cecile Noirjean,<sup>\*,†</sup> Cedric Vancaeyzeele,<sup>‡</sup> Sophie Bourcier,<sup>‡</sup> Fabienne Testard,<sup>†</sup>  
Frederic Vidal,<sup>‡</sup> David Carriere,<sup>†</sup> and Odile Fichet<sup>\*,‡</sup>

<sup>†</sup>*LIONS, NIMBE, CEA, CNRS, Université Paris-Saclay, CEA Saclay, 91191  
Gif-sur-Yvette Cedex, France*

<sup>‡</sup>*Laboratoire de Physicochimie des Polymères et des Interfaces (LPPI), Université de  
Cergy-Pontoise, Institut des matériaux, 5 mail Gay Lussac, Neuville-sur-Oise, 95031  
Cergy-Pontoise Cedex, France*

E-mail: cecile.noirjean@saint-gobain.com; odile.fichet@u-cergy.fr

## SAXS curves of aqueous and organic phases

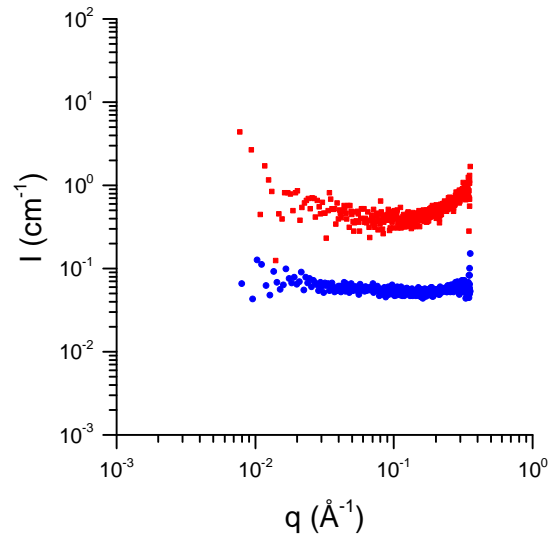

Figure 1: SAXS curves of aqueous phase before (blue squares) and after polymerization (red circles,  $\times 10$ )

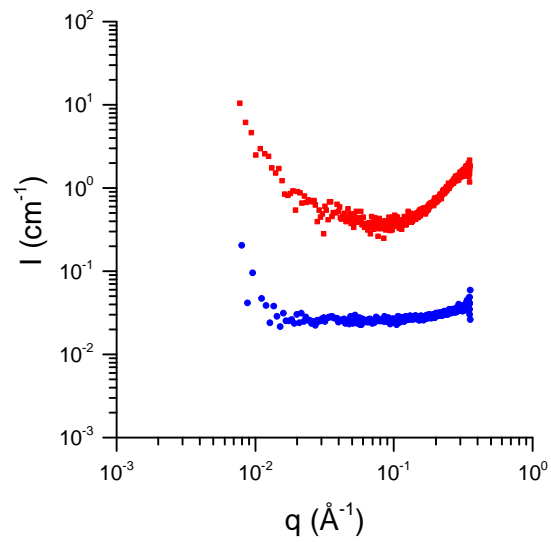

Figure 2: SAXS curves of organic phase before (blue squares) and after polymerization (red circles,  $\times 10$ )

## Bragg peaks in the cubic bicontinuous phase

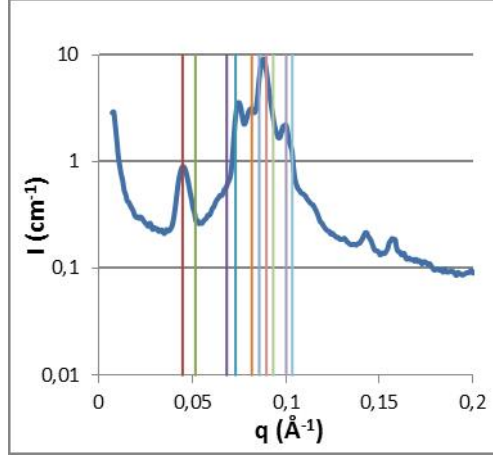

Figure 3: SAXS curves of BC sample before polymerization with Bragg peaks position of an Ia3d bicontinuous cubic structure:  $q_0, \frac{2}{\sqrt{3}}q_0, \sqrt{\frac{7}{3}}q_0, 2\sqrt{\frac{2}{3}}q_0, \sqrt{\frac{10}{3}}q_0, \sqrt{\frac{11}{3}}q_0, 2q_0, \sqrt{\frac{13}{3}}q_0, \sqrt{5}q_0, \frac{4}{\sqrt{3}}q_0, \dots$  with  $q_0 = 0.0448 \text{ Å}^{-1}$

## Models used for fitting SAXS curves

- *Form factor of monodisperse spheres* of radius  $R$ :

$$P(q) = A \cdot \left( \frac{3(\sin(qR) - qR \cdot \cos(qR))}{(qR)^3} \right)^2 \quad (1)$$

with the prefactor:  $A = \bar{n}(l_T \cdot v \Delta\mu)^2$  with  $v$  the volume of the droplets,  $l_T$  the scattering length of a single electron ( $2.81 \cdot 10^{-13} \text{ cm}$ ),  $\bar{n}$  the numerical density of droplets, and  $\Delta\mu$  the differential electron density between the oil droplets and water.

- *Form factor of polydisperse spheres* of radius  $R$  with a Gaussian standard deviation  $\sigma$ :

$$P(q) = A \cdot \frac{1 + (qR)^2 + (q\sigma)^2 - e^{-2(q\sigma)^2} (f_{\cos}(q) + f_{\sin}(q))}{(qR)^6} \quad (2)$$

where :

$$f_{\cos}(q) = ((1 + 2(q\sigma)^2) - (qR)^2 - (q\sigma)^2) \cdot \cos(2qR), \text{ and } f_{\sin}(q) = 2qR(1 + 2(q\sigma)^2) \cdot \sin(2qR)$$

with the prefactor:  $A = 8\pi^2 \cdot \bar{n} \cdot (\Delta\rho)^2 \cdot R^6$ ,  $N$  being the number of objects, and  $\Delta\rho$  the differential scattering length density between droplets and the continuous phase.

- *Structure factor for hard spheres interaction* of radius  $R_{HS}$  and volume fraction of interacting objects  $\Phi_{HS}$ :

$$S_{HS}(q) = \frac{1}{1 + \frac{24 \cdot \Phi_{HS} \cdot G}{2 \cdot q \cdot R_{HS}}} \quad (3)$$

where

$$G = \alpha \cdot \frac{\sin(a) - a \cos(a)}{a^2} + \beta \cdot \frac{2a \sin(a) + (2 - a^2) \cdot \cos(a) - 2}{a^3} + \gamma \cdot \frac{-a^4 \cos(a) + 4((3a^2 - 6) \cos(a) + (a^3 - 6a) \sin(a) + 6)}{a^5}$$

with  $a = 2 \cdot q \cdot R_{HS}$ ,  $\alpha = \frac{(1 + 2 \cdot \Phi_{HS})^2}{(1 - \Phi_{HS})^4}$ ,  $\beta = \frac{-6 \cdot \Phi_{HS} \cdot (1 + \Phi_{HS}/2)^2}{(1 - \Phi_{HS})^4}$  and  $\gamma = \Phi_{HS} \cdot \alpha/2$

- *Teubner-Strey model* with correlation length  $\xi$  and period  $d$ :

$$I_{TS}(q) = \frac{A_{TS}}{1 - 2 \left( \frac{Mq}{L^2} \right)^2 + \left( \frac{q}{L} \right)^4} \quad (4)$$

where  $L = \sqrt{\left( \frac{2\pi}{d} \right)^2 + \frac{1}{\xi^2}}$  and  $M = \sqrt{\left( \frac{2\pi}{d} \right)^2 - \frac{1}{\xi^2}}$

with the prefactor:  $A_{TS} = \frac{8\pi(\Delta\rho)^2}{\xi \left( \left( \frac{2\pi}{d} \right)^2 + \frac{1}{\xi^2} \right)^2} \cdot \Phi(1 - \Phi)$ ,  $\Phi$  being the volume fraction of one phase, and  $\Delta\rho$  the differential electron density between the aqueous and organic phases.

## Electron contrast between aqueous and organic phases

The prefactor of the form factor found by fitting SAXS curve of OinW sample is:

$$A = \Phi \cdot v \cdot (l_T \cdot \Delta\mu)^2 = 0.32 \text{ cm}^{-1} \quad (5)$$

where:

- $\Phi = \Phi_{HS} \cdot (R/R_{HS})^3$  is the volume fraction of the oil droplets calculated from hard-sphere volume fraction ( $\Phi_{HS}$ ), hard-sphere radius ( $R_{HS}$ ), and droplet radius ( $R$ )

- $v = 4/3 \cdot \pi \cdot R^3$  is the volume of one droplet
- $l_T = 2.8 \cdot 10^{-13}$  cm is the scattering length of a single electron
- $\Delta\mu$  is the electron contrast.

We can then determine the electron contrast between aqueous and organic phases:

$$\Delta\mu = 1.0 \cdot 10^{23} \text{ electrons/cm}^3$$

This value is consistent with the compositions of aqueous (water, AMPS and MBA) and organic phases (HMA and EGDMA).
